# Supplementary material for: An electrochemically deposited film as an interface layer to improve the performance of polymer light-emitting diodes
Source: Royal Society of Chemistry journal article supplement (doi:10.1039/c4tc00373j), 2014-01-01
Supplement: c4tc00373j1.pdf [file c4tc00373j1.pdf]

Supporting information for:

## **Electrochemically Deposited Film as Interface Layer to Improve the Performance of Polymer Light-emitting diodes**

Tiancheng Yu, Xiaoyan Wu, Ying Lv, Linlin Liu\*, Luyang Du, Jiadong Zhou, Zengqi Xie, Yuguang Ma\*

Institute of Polymer Optoelectronic Materials and Devices, State Key Laboratory of Luminescent Materials and Devices, South China University of Technology, Guangzhou 510640, P. R. China

[ygma@scut.edu.cn](mailto:ygma@scut.edu.cn); [msliull@scut.edu.cn](mailto:msliull@scut.edu.cn)

Table of Contents:

|                                                             |    |
|-------------------------------------------------------------|----|
| 1. Electrochemical redox behavior of TCPC on PEDOT:PSS..... | S2 |
| 2. AFM images of PEDOT:PSS and ECP layers.....              | S2 |
| 3. Absorption spectrum of ECP thin film<br>.....            | S3 |
| 4. I-V characteristic of hole only device .....             | S3 |
| 5. Electroluminescence spectrum of PLEDs device .....       | S4 |

## 1. Electrochemical redox behavior of TCPC on PEDOT:PSS

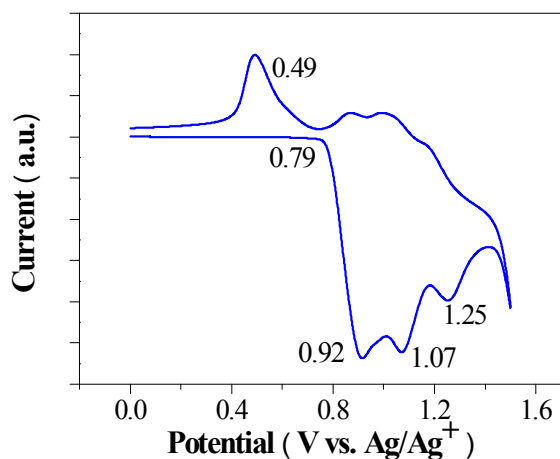

**Figure S1.** Cyclic voltammogram for electrochemical polymerization under conditions such as: 1 mg mL<sup>-1</sup> TCPC, 0.1 M TBAPF<sub>6</sub>, scanning potential region 0 V to + 1.5 V, mixed solvents V<sub>CH<sub>2</sub>Cl<sub>2</sub></sub>:V<sub>CH<sub>3</sub>CN</sub> = 2:3, scanning rate 50 mV/s.

## 2. AFM images of PEDOT:PSS and ECP layer

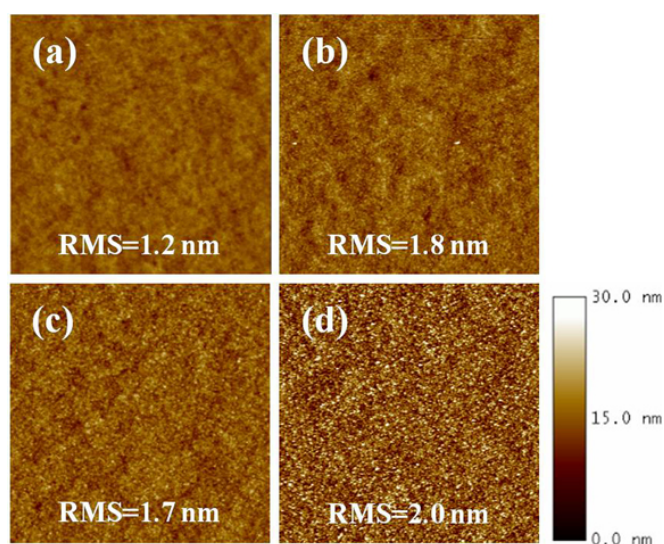

**Figure S2.** AFM height images of (a) ITO/PEDOT:PSS and (b,c,d) ITO/PEDOT:PSS/ECP (6, 12, 15 nm). The size of the images is 5×5 μm. The ECP film is prepared under conditions such as: 1 mg mL<sup>-1</sup> TCPC, 0.1 M TBAPF<sub>6</sub>, scanning potential region - 0.8 V to + 0.83 V, mixed solvents V<sub>CH<sub>2</sub>Cl<sub>2</sub></sub>: V<sub>CH<sub>3</sub>CN</sub> = 2:3, scanning rate 200 mV/s.

### 3. Absorption spectrum of ECP thin film on ITO/PEDOT:PSS substrate before and after rinse

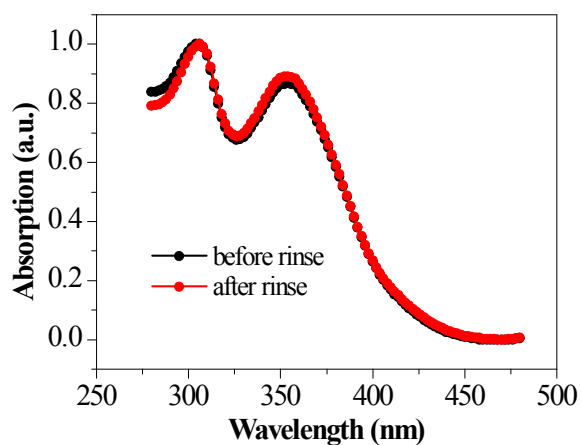

**Figure S3.** Absorption spectrum of ECP thin film on ITO/PEDOT:PSS substrate before and after rinse with *p*-xylene used to dissolve light-emitting P-PPV.

### 4. I-V characteristic of hole only device

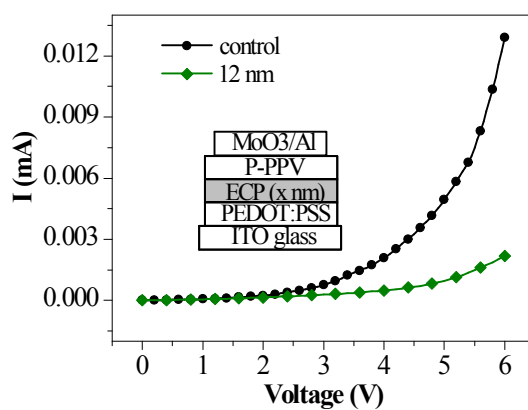

**Figure S4.** The I-V characteristic of hole only devices of ITO/PEDOT:PSS (40 nm)/ECP (x nm)/P-PPV (80 nm)/MoO<sub>3</sub> (10 nm)/Al (120 nm), x=0, 12 nm. X = 0 means that there was no ECP layer between PEDOT:PSS and P-PPV, which was actually a control device.

## 5. Electroluminescence (EL) spectrum of PLEDs device

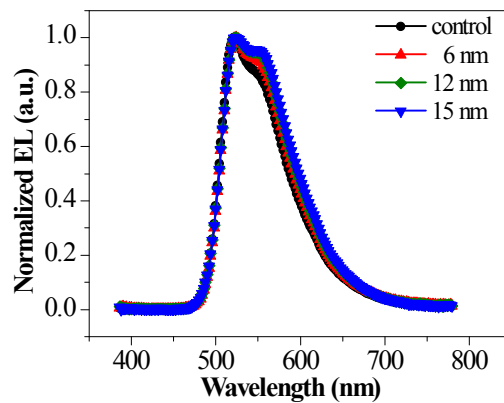

**Figure S5.** The EL spectra of PLEDs devices with ECP thin layer of different thickness.
